# Supplementary material for: A solid-state structural and theoretical study on the 1 ∶ 1 addition compounds of thioethers with dihalogens and interhalogens I–X (X = I, Br, Cl)
Source: Royal Society of Chemistry journal article supplement (doi:10.1039/b411873a), 2004-12-06
Supplement: b411873a.pdf [file b411873a.pdf]

Supplementary Data

Fig. S1 The molecular structure of 1.

Fig. S2 The molecular structure of 2.

Figures

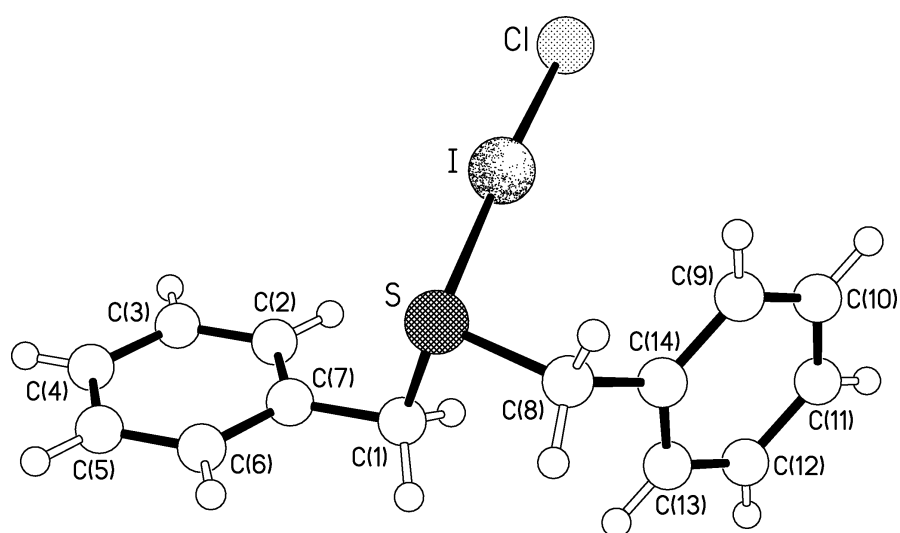

Fig. S1

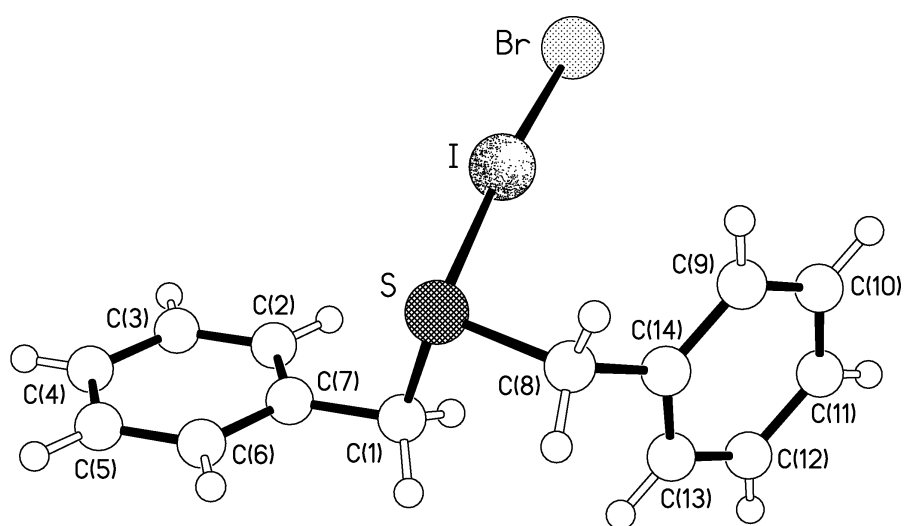

Fig. S2
